STUDY PROTOCOL

# Improving reading competence in aphasia with combined aerobic exercise and phonomotor treatment: Protocol for a randomized controlled trial

Olga Boukrina<sup>1,2\*</sup>, Elizabeth B. Madden<sup>3</sup>, Brian M. Sandroff<sup>2,4</sup>, Xiangqin Cui<sup>5</sup>, Abubakar Yamin<sup>6</sup>, Yekyung Kong<sup>2,7</sup>, William W. Graves<sup>8</sup>

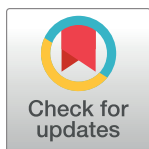

**1** Center for Stroke Rehabilitation Research, Kessler Foundation, West Orange, NJ, United States of America, **2** Department of Physical Medicine and Rehabilitation, Rutgers-New Jersey Medical School, Newark, NJ, United States of America, **3** Department of Communication Science and Disorders, Florida State University, Tallahassee, FL, United States of America, **4** Center for Neuropsychology and Neuroscience Research, Kessler Foundation, East Hanover, NJ, United States of America, **5** Department of Biostatistics and Bioinformatics, Rollins School of Public Health, Emory University, Atlanta, GA, United States of America, **6** City University of New York (CUNY) School of Medicine, New York, NY, United States of America, **7** Kessler Institute for Rehabilitation, West Orange, NJ, United States of America, **8** Psychology Department, Rutgers, The State University of New Jersey, Newark, NJ, United States of America

\* [oboukrina@kesslerfoundation.org](mailto:oboukrina@kesslerfoundation.org)

## OPEN ACCESS

**Citation:** Boukrina O, Madden EB, Sandroff BM, Cui X, Yamin A, Kong Y, et al. (2025) Improving reading competence in aphasia with combined aerobic exercise and phonomotor treatment: Protocol for a randomized controlled trial. PLoS ONE 20(1): e0317210. <https://doi.org/10.1371/journal.pone.0317210>

**Editor:** Vanessa Carels, PLoS ONE, UNITED STATES OF AMERICA

**Received:** December 12, 2024

**Accepted:** December 18, 2024

**Published:** January 16, 2025

**Copyright:** © 2025 Boukrina et al. This is an open access article distributed under the terms of the [Creative Commons Attribution License](https://creativecommons.org/licenses/by/4.0/), which permits unrestricted use, distribution, and reproduction in any medium, provided the original author and source are credited.

**Data Availability Statement:** No datasets were generated or analyzed during the current study. All relevant data from this study will be made available upon study completion.

**Funding:** This study is funded by a grant from the National Institute on Deafness and Other Communication Disorders (NIDCD; R01DC021063; PI: Boukrina). The funders had no role in study design, data collection and analysis, decision to publish, or preparation of the manuscript.

## Abstract

Aphasia, a communication disorder caused primarily by left-hemisphere stroke, affects millions of individuals worldwide, with up to 70% experiencing significant reading impairments. These deficits negatively impact independence and quality of life, highlighting the need for effective treatments that target the cognitive and neural processes essential to reading recovery. This Randomized Clinical Trial (RCT) aims to test the efficacy of a combined intervention incorporating aerobic exercise training (AET) and phonomotor treatment (PMT) to enhance reading recovery in individuals with post-stroke aphasia. AET, known for its positive impact on cerebral blood flow (CBF) and oxygenation, is hypothesized to facilitate neuroplasticity when administered before PMT, an intensive therapy aimed at strengthening phonological processing. While most existing treatments focus on spoken language production, this study builds on evidence that PMT can also improve reading skills. The study is structured as a Phase I/II clinical trial and compares the effects of AET plus PMT to a control condition of stretching plus PMT on reading and other language outcomes including naming, auditory comprehension, and spontaneous speech. Additionally, it investigates the immediate and sustained impacts of the intervention on CBF, functional connectivity, and task-evoked brain activity. The central hypothesis posits that AET will increase CBF and, when combined with PMT, will lead to enhanced reading recovery, supporting treatment-induced plasticity. This trial represents one of the first large-scale interventions targeting post-stroke reading impairments and provides critical insights into the potential of combining AET with cognitive rehabilitation to improve language recovery in aphasia.

**Competing interests:** The authors have declared that no competing interests exist.

## Introduction

Aphasia is a highly-prevalent and debilitating communication disorder predominantly caused by left-hemisphere stroke affecting speaking, understanding, reading and writing [1–3]. Reading deficits can occur in up to 70% of individuals with aphasia [4] resulting in negative impact on independence, employment, inclusion, and quality of life [3, 5].

Although individuals with aphasia express a strong desire to improve their reading ability [6], the vast majority of aphasia interventions target spoken word retrieval or discourse production [7–11], wherein gains in reading ability are either not observed or not measured. A notable exception are treatments that target specific information processing components, such as phonology [12–15]. For example, phono-motor treatment (PMT) results in significant gains in single word reading [12, 13]. However, such treatments demonstrate the greatest benefits on words used in treatment, with smaller benefits on untrained items [16, 17]. One potential reason for such limited generalizability might involve decreased cerebral blood flow (CBF) in areas supporting language processing.

A growing body of neuroimaging literature in post-stroke aphasia, including our work [18], suggests that CBF is decreased after a left hemisphere stroke in areas that are not directly affected by an obvious structural lesion [19–23]. Decreased left hemisphere perfusion is negatively correlated with language performance. In addition, phonological competence, critically important for reading [24–27], remains impaired in participants with chronic left-hemisphere stroke [28]. Thus, recovery of reading may be improved by remediating phonological processing while augmenting CBF in the affected hemisphere. One approach that increases CBF is aerobic exercise training (AET).

AET is a type of structured and repetitive physical activity that induces oxygen metabolism to meet energy demands, performed for improving or maintaining cardiorespiratory fitness [29]. Systematic reviews support AET-related cognitive improvements among stroke survivors [30, 31], older adults [32], and those with hypertension [33]. One study reported that moderate intensity AET increases global CBF among stroke survivors [34]. Even a single bout of aerobic exercise increases regional CBF and oxygenation in an intensity-dependent manner [35]. We hypothesize that aerobic exercise administered immediately prior to the initiation of a targeted reading treatment will improve cerebral circulation and facilitate treatment-induced neural plasticity. A full course of AET is expected to increase basal CBF and improve cardiovascular function, promoting the acquisition, retention, and generalization of therapy skills by supplying oxygen and nutrients to brain areas supporting these processes.

PMT aims to strengthen the ability to process and manipulate phonological representations, which improves the efficiency and accuracy of language processing [36]. Several Phase I and Phase II clinical trials have demonstrated PMT effectiveness for generalization and maintenance of expressive language [37]. Specifically, in a Phase II trial, 60 hours of PMT resulted in medium-to-large improvements in naming trained nouns, and small-to-medium improvements in naming untrained nouns both immediately and three months post-treatment [36]. Additionally, benefits have been shown to extend to discourse production [38]. Several studies also report that PMT can improve reading skills [12, 13, 39, 40]. To better support the retraining of grapheme-phoneme correspondences, we have adapted PMT to introduce graphemes (written representations of phonemes, e.g., “a”, “ch”) from the outset and consistently incorporate them throughout therapy [41].

This Phase I/II randomized clinical trial (RCT) combines AET with PMT, comparing this intervention with an active control (stretching + PMT) for its impact on primary (reading competence) and secondary (naming, auditory comprehension, and spontaneous speech) language outcomes (Study aim 1). We will additionally examine the immediate impact of aerobic

exercise (Study aim 2) and sustained impact (Study aim 3) of AET combined with PMT on brain outcomes, including CBF, resting-state functional connectivity (rsFC), and task-evoked brain activity. Our central hypothesis is that aerobic exercise delivered before PMT sessions, will facilitate treatment-induced plasticity, leading to robust reading improvements over time.

## Methods

### Experimental design

This RCT is a single center, stratified (with balanced 1:1 randomization), parallel-group study conducted in the United States. It has been IRB-approved and pre-registered on [clinicaltrials.gov](https://clinicaltrials.gov) (NCT06213272). The RCT will be conducted and reported in accordance with CONSORT guidelines [42]. An independent Data Safety Monitoring Board will monitor data collection for accuracy and participant safety. The data collection for this project began on April 18, 2024, and is expected to continue until September 30, 2029.

After consenting and eligibility assessment, participants will be randomly assigned to one of two conditions using concealed allocation according to a randomization table created using computerized random number generation. Participants in the experimental condition ( $n = 35$ ) will receive AET plus PMT (AET + PMT) and participants in the active control condition ( $n = 35$ ) will undergo Stretching activities plus PMT (Stretching + PMT) (Fig 1).

Participants in the AET + PMT condition will complete moderate intensity cycling prior to each PMT session, while participants in the Stretching + PMT condition will complete light stretching prior to each PMT session. We will assess reading aloud accuracy, and measure accuracy on the Reading Comprehension Battery for Aphasia (RCBA) 2<sup>nd</sup> edition [43] and 2-alternative forced choice (2AFC) tasks measuring semantics, phonology, and orthography processing [41, 44] as primary outcomes. We will also collect performance on the Western Aphasia Battery-Revised (WAB) [45], Philadelphia Naming Test (PNT) [46], and Comprehensive Aphasia Test Disability Questionnaire (CAT-DQ) [47] as secondary language outcomes before and after the full course of treatment. To better understand the neural mechanisms underlying potential improvements resulting from the interventions, we will collect brain outcomes, including CBF, rsFC, and task-evoked brain activity.

### Randomization

Randomization lists will be generated by a biostatistician and will be stratified based on aphasia severity, categorized into three levels based on WAB Aphasia Quotient (AQ) scores at screening: mild (i.e., 75–100), moderate (i.e., 50–74.9), and severe (i.e., <50). In addition, we will ensure that any left-handed individuals (estimated 10%) will be equally represented in each condition. Participants will be randomly assigned into the experimental (AET + PMT,  $n = 35$ ) or the active control condition (Stretching + PMT,  $n = 35$ ). Treatment will be administered by the Treating RAs who will be masked to participants' performance on all assessments. Testing will be performed by an Assessing RA who will be masked to participants' assigned condition. Participants will be masked as to the intent of the conditions (i.e., AET represents the experimental condition and stretching represents the active control); the study will be advertised as comparing two different exercise programs combined with reading treatment for improving reading.

### Participants

**Recruitment.** Participants in this study will present with aphasia from a single chronic left-hemisphere stroke. Participants will be recruited from inpatient and outpatient

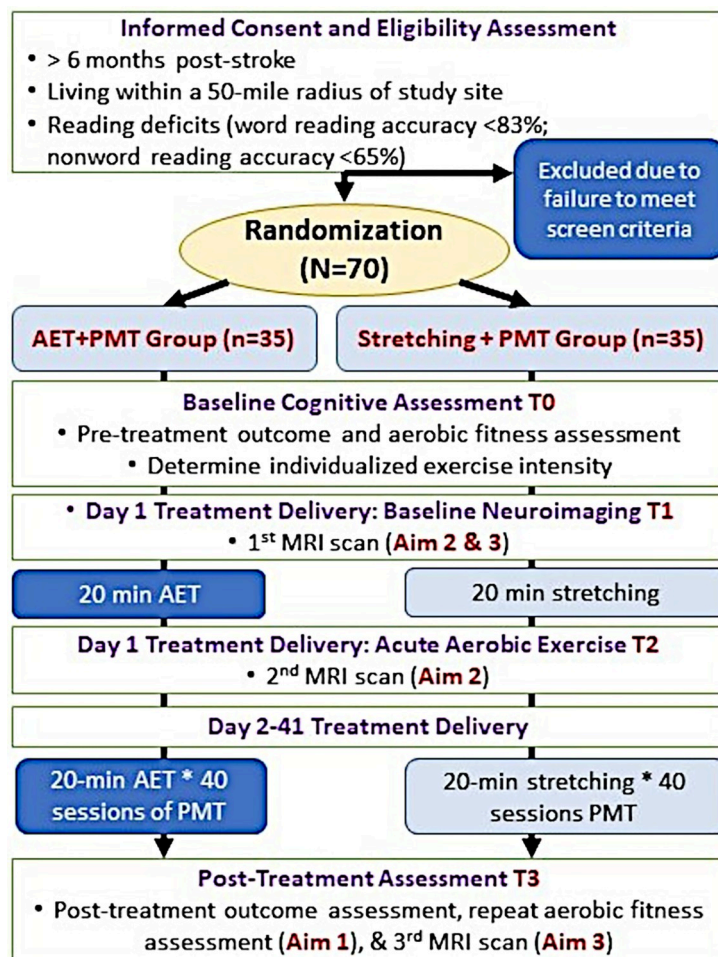

Fig 1. Study design.

<https://doi.org/10.1371/journal.pone.0317210.g001>

rehabilitation facilities across the three campuses of the Kessler Institute for Rehabilitation, located in West Orange, Saddle Brook, and Chester, NJ. We will additionally recruit participants from local community organizations. All participants meeting the inclusion criteria will be given equal consideration without reference to biological sex, self-identified gender, race, or ethnicity.

**Inclusion and exclusion criteria.** Potential participants will be screened using a 2-part screening procedure (Table 1). An initial phone screen will assess diagnoses, age, geographic location, presence of aphasia and other comorbid conditions. Eligible participants will then complete an in-person screening visit, where they will provide written informed consent using an aphasia-friendly consent form [48]. Once enrolled, participants will be screened for Magnetic Resonance Imaging (MRI) safety, contraindications for physical activity (PAR-Q+) [49] and will complete a comprehensive language, cognition, vision, and health evaluation.

As a final eligibility criterion, participants will be screened for reading deficits. They will read aloud 120 words and 80 readable nonwords presented one at a time on a computer screen, while being audio recorded. If they score below 1.5SDs of the healthy control mean on measures of word (<83% correct) or nonword (<65% correct) reading accuracy, participants will be randomized into one of the treatment conditions.

**Table 1. Inclusion and exclusion criteria.**

|                                                                                                                                                                                                                                                                                                                                                                                                                                                                                                                                                                                                                                                                                                                                                                                                                                                   |
|---------------------------------------------------------------------------------------------------------------------------------------------------------------------------------------------------------------------------------------------------------------------------------------------------------------------------------------------------------------------------------------------------------------------------------------------------------------------------------------------------------------------------------------------------------------------------------------------------------------------------------------------------------------------------------------------------------------------------------------------------------------------------------------------------------------------------------------------------|
| <b>Phone screen</b>                                                                                                                                                                                                                                                                                                                                                                                                                                                                                                                                                                                                                                                                                                                                                                                                                               |
| <ul style="list-style-type: none"> <li>• Age: 18–85 years old</li> <li>• Unilateral LH stroke &gt; 6 months to ensure patients are at the post-acute stage of stroke-induced tissue reorganization [50], later confirmed with a clinical brain scan or from hospital/radiology records when necessary</li> <li>• No prior neurological incidents (e.g., traumatic brain injury, seizures, or brain tumors), multiple symptomatic strokes, psychiatric or neurodegenerative diseases affecting the brain</li> <li>• Premorbid English fluency and literacy (non-native speakers will be included if fluent in English prior to stroke based on self and caregiver reports)</li> <li>• Home located out of a 50-mile radius from the study site, due to required frequent travel for therapy visits, outcome assessment, and brain scans</li> </ul> |
| <b>In-person screen</b>                                                                                                                                                                                                                                                                                                                                                                                                                                                                                                                                                                                                                                                                                                                                                                                                                           |
| <ul style="list-style-type: none"> <li>• Able to consent using aphasia-friendly consent process [48] and complete study tasks</li> <li>• Able to undergo MRI scans</li> <li>• No contraindications for aerobic exercise based on PAR-Q+ [49] or physician's clearance for participation in AET</li> <li>• Not undergoing one-on-one speech and language therapy</li> <li>• Reading aloud accuracy &lt;83% for words or &lt;65% for readable nonwords (1.5 SDs below the healthy control mean in preliminary studies)</li> </ul>                                                                                                                                                                                                                                                                                                                   |

Abbreviations: LH, left hemisphere; MRI, magnetic resonance imaging.

<https://doi.org/10.1371/journal.pone.0317210.t001>

**Attrition.** Considering potential attrition, especially in the AET group [51], we built in a 5% attrition in the Stretching + PMT condition and 15% in the AET + PMT condition into our recruitment targets allowing us to meet our proposed sample size goals.

**Sample size justification.** For study aim 1 (AET + PMT impact on reading outcomes), previous studies and our pilot data suggested medium to very large effect size (ES) of PMT [36], and AET combined with aphasia therapy [52] and small ES of AET + PMT over PMT alone. To detect within-group effects, 8 participants are needed for 80% power, and 66 participants for the interaction analysis, making our sample of 70 sufficient. For study aims 2 and 3 (immediate and sustained impact of aerobic exercise on CBF, rsFC, and task fMRI), pilot data showed small ES of acute exercise and large ES for AET+PMT on global CBF ( $f = 0.23$  and  $0.35$ , respectively). This provides 80% power to detect acute CBF changes in up to 25 brain regions and sustained changes across 333 functional regions of the Gordon atlas [53]. Pilot data also showed large ES for rsFC and task fMRI ( $f = 0.86$ – $0.87$  in left fusiform (FG) and supramarginal gyrus (SMG)), offering over 99% power to detect within-group effects and sufficient power for between-within interactions and brain-behavior correlations.

**Treatment procedures.** Participants will receive 40, 2-hour intervention sessions administered 5 times/week by Treating RAs. Depending on group assignment, they will complete either 20 minutes of AET or stretching followed by 90 minutes of PMT. This treatment schedule yields a 60-hour dose of PMT, consistent with previous RCTs [54]. Similarly, studies demonstrating standalone AET benefits on brain function have used treatments of comparable duration in stroke participants [55]. To facilitate adherence to the interventions, we will arrange transportation, provide reminders, educate participants about the potential benefit of the study to other stroke survivors, and provide remuneration to participants.

**AET.** The AET modality involves cycling on a research-grade, electronically braked cycle ergometer (Lode Corival CPET Ergometer, Groningen, Netherlands). AET intensity will be prescribed at a work rate corresponding with 60% heart rate reserve (HRR) with values obtained from a baseline incremental exercise test to exhaustion. Participants will be fitted with a Polar HR Monitor (Oy, Finland) and HR will be monitored continuously in each session. All sessions begin with a 5-min warm-up, followed by the exercise (the 60% HRR range will be maintained for as long as possible during each 20-minute exercise period), and a 5-min



cool-down. At the end of each exercise session (prior to PMT), participants will complete an exercise log to characterize their experience with the intervention. As aerobic exercise bouts are included to prime the brain for PMT via increases in CBF, there will be no progression in terms of frequency, duration, or intensity throughout the 8-week program. When HR returns to near resting levels (i.e., 5-min after cool-down), participants will receive PMT for the remaining 90 minutes.

**Stretching.** The active control condition will involve light stretching and range-of-motion activities. Stretching has been used in RCTs investigating AET in healthy [56–59] and neurological populations [60–62] to account for attention, social contact, and therapist interactions. Light stretching is associated with a minimal likelihood of inducing meaningful changes in CBF or cerebrovascular function through aerobic fitness adaptations [63, 64]. Frequency and duration of the stretching sessions will be identical to that of the AET. Stretching activities will target the head/neck, shoulder, elbow/forearm, hand/wrist, trunk/hip, ankle/foot. To ensure that the stretching sessions occur at a low intensity, HR will be monitored throughout each session using the same type of HR monitors as for the AET + PMT group. As is the case for the AET, participants will complete a log at the end of each session to better characterize intervention experience, and within 5 min of completing the last stretching activity, participants will undertake PMT for 90 minutes. We will ask participants in both conditions to refrain from initiating additional exercise, while keeping track on a by-session basis of the duration and kind of exercise undertaken outside the study.

**PMT.** As participants will be selected based on single word and nonword reading difficulties, all are expected to have phonological deficits. PMT will start by retraining English consonants in cognate pairs (e.g., p/b), followed by vowels with a focus on articulatory differences (e.g., ee vs. oo), and then progress to phonological sequences, beginning with single syllables (CVC, CVCC, CCVC) and advancing to multi-syllabic combinations. Unlike traditional PMT, which delays orthography for the first two weeks, this study will integrate letters from the outset to prioritize both orthographic and phonological processing. Participants will begin with nonword sequences (e.g., eep) to reduce semantic facilitation before progressing to real words.

We will select 40 real words and 40 readable nonword letter strings for use in treatment, personalized for each participant based on their baseline performance. Half of the treated stimulus list will consist of words and nonwords read incorrectly at baseline, while the other half will include stimuli read correctly, allowing for a balanced comparison with the untreated items. Untreated words and nonwords will be tested to assess generalization. Despite the use of a treated stimulus list, the overarching goal of PMT will be to enhance phonological and orthographic awareness rather than focus on learning specific words.

PMT tasks will engage multiple modalities, including observing mouth movements (visual), discriminating phonemes (acoustic), feeling the physical production of sounds (tactile-kinesesthetic), producing sounds (motor), and manipulating graphemes (orthographic). Each task will serve to reinforce grapho-phonological representations. Memory aids, such as letter tiles and mouth pictures, will be incorporated to support working memory. The modified PMT protocol targeting reading has previously yielded significant improvements in both pilot and case series studies [41].

**PMT treatment fidelity.** Treatment fidelity procedures will follow recommendations of the international Collaboration of Aphasia Trialists (CAT) [65]. Treating RAs will be trained during an in-person workshop by the second author who has extensive experience with PMT. Weekly or as-needed videoconferences will be held to continue training and ensure the Treating RAs are knowledgeable about treatment procedures. Each treatment session will be video recorded, with at least two videos per week randomly selected for fidelity checks, ensuring 20% of sessions are assessed per participant. A treatment fidelity checklist modified from

## Phonomotor Treatment Fidelity Checklist

Treating Clinician:

Participant:

Observer:

Date of therapy:

|                            | Phonological Tasks |                             |                                           |                                           | Other Techniques             |                      |                                                                                                                             | TOTAL:                   |
|----------------------------|--------------------|-----------------------------|-------------------------------------------|-------------------------------------------|------------------------------|----------------------|-----------------------------------------------------------------------------------------------------------------------------|--------------------------|
|                            | Repetition         | Listening (identify sounds) | Reading (grapheme-phoneme correspondence) | Writing (phoneme-grapheme correspondence) | Discussion of Mouth Movement | Socratic Questioning | Materials Used (must use letters in some form)                                                                              |                          |
| Part 1: Consonants         | YES                | YES                         | YES                                       | YES                                       | YES                          | YES                  | Blocks<br>Consonant chart<br>Mirror<br>Letter tiles<br>White board                                                          | Consonant fidelity:      |
|                            | NO                 | NO                          | NO                                        | NO                                        | NO                           | NO                   |                                                                                                                             | /7                       |
| Part 2: Vowels             | YES                | YES                         | YES                                       | YES                                       | YES                          | YES                  | Blocks<br>Vowel chart<br>Letter tiles<br>Mirror<br>White board                                                              | Vowel fidelity:          |
|                            | NO                 | NO                          | NO                                        | NO                                        | NO                           | NO                   |                                                                                                                             | /7                       |
| Part 3: Words and Nonwords | YES                | YES                         | YES                                       | YES                                       | YES                          | YES                  | Blocks<br>Consonant chart<br>Vowel chart<br>Mirror<br>Letter tiles<br>White board<br>Trained nonwords<br>Trained real words | Words/Nonwords fidelity: |
|                            | NO                 | NO                          | NO                                        | NO                                        | NO                           | NO                   |                                                                                                                             | /7                       |
| Notes:                     |                    |                             |                                           |                                           |                              |                      |                                                                                                                             | Session fidelity: /21    |

Fig 2. Phonomotor treatment fidelity checklist.

<https://doi.org/10.1371/journal.pone.0317210.g002>

Kendall et al. [54] will be used (see Fig 2). Any deviations from the protocol identified during the treatment fidelity checks will be addressed in weekly meetings to ensure the protocol is delivered correctly.

## Outcomes

**Behavioral outcome assessment.** Participants will complete baseline (T0, Fig 1) and post-treatment (T3) assessments conducted by an Assessing RA. The primary and secondary language outcomes and covariates are detailed in Table 2. Additionally, Treating RAs will conduct pre- and post-treatment interviews to gather participants' perspectives on their experience.

**Aerobic fitness assessment.** In the baseline assessment visit (T0, Fig 1), participants will complete an incremental exercise test (IET) to exhaustion on an electronically braked cycle ergometer and open-circuit spirometry system for analyzing expired gases (ParvoMedics True One 2400, Sandy, UT). The IET will determine exercise intensity for AET-assigned participants, via the Karvonen equation [78]. During the IET, the work rate will increase at 15 W/minute until volitional exhaustion. Such a protocol aligns with previous studies [79] and American College of Sports Medicine (ACSM) guidelines for cardiopulmonary exercise testing for those with neurological disorders [80].  $VO_{2peak}$  (peak oxygen consumption) will be expressed in ml/kg/min based on the highest recorded 20-second  $VO_2$  value when 2 of 4 criteria are satisfied: (1)  $VO_2$  plateau with increasing work rate, (2) respiratory exchange ratio  $\geq 1.10$ , (3) peak heart rate (HR) within 10 beats per minute of age-predicted maximum, or (4) peak rating of perceived exertion  $\geq 17$  (range 6–20). This assessment, repeated post-treatment (T3), serves as a manipulation check, with larger improvements expected for AET.

**MRI scans.** Participants will undergo MRI scans (Fig 1, T1, T2, T3) on a 3.0T Vida-FIT Siemens scanner using an adjustable 20-channel head coil. We will acquire structural, functional, and perfusion scans. Participants will be asked to avoid caffeine and planned exercise on assessment days and will complete the scans at least 2h postprandial.

**Structural neuroimaging.** To help segment stroke lesions and detect any new pathology, we will acquire a T1-weighted structural scan (TR = 1850 ms, TE = 3.43 ms, TI = 933ms, 176

Table 2. Outcome measures.

| Session                                       | Type                                | Test and Description (Test Time Estimate Based on Preliminary Studies)                                                                                                                                                                                                                                                                                                                                                                                                                                                                                                                                                                                                                                                                                                                                                                                                                                                                                                                                                                                                                                                                               |
|-----------------------------------------------|-------------------------------------|------------------------------------------------------------------------------------------------------------------------------------------------------------------------------------------------------------------------------------------------------------------------------------------------------------------------------------------------------------------------------------------------------------------------------------------------------------------------------------------------------------------------------------------------------------------------------------------------------------------------------------------------------------------------------------------------------------------------------------------------------------------------------------------------------------------------------------------------------------------------------------------------------------------------------------------------------------------------------------------------------------------------------------------------------------------------------------------------------------------------------------------------------|
| Baseline and Post-treatment Tests (T0 and T3) | Primary (Reading Outcomes)          | RCBA-2 [43]: Letter, word, sentence, & paragraph reading comprehension test for aphasia (1 hour).<br>Reading Aloud [44]: Participants will read aloud 120 words and 80 nonwords, some of which will be selected for PMT based on individual accuracy ( <u>treated items</u> ). A subset of these will not be treated and will be used to assess generalization. The treated and untreated lists will be balanced for frequency, imageability, and spelling-sound consistency (20 min).<br>2AFC [66–68]: Touch-screen computer tests of <u>semantics</u> , <u>phonology</u> , & <u>orthography</u> (composite score). Participants choose one of two examples on the screen that matches a target in meaning (semantics), rhymes with the target (phonology), or chose a letter string that more closely resembles a word (45 min).                                                                                                                                                                                                                                                                                                                   |
|                                               | Secondary (Other Language Outcomes) | WAB-R [45]: A comprehensive assessment of language impairments in aphasia (45 min).<br>PNT (Short) [46]: A 30-item picture naming test designed to identify word finding difficulties. It will be presented on a computer using line drawn images of animate and inanimate objects and audio recorded (10 min).<br>CAT-DQ [47]: Self-reported language competence/disability ratings (10 min).                                                                                                                                                                                                                                                                                                                                                                                                                                                                                                                                                                                                                                                                                                                                                       |
|                                               | Tertiary (Mobility Outcomes)        | 10-meter walk test [69]: a test used to assess walking speed in meters/second (4 min).<br>6-min walk test [70]: a submaximal exercise test used to assess walking endurance and aerobic capacity. Participants walk a set circuit for 6 minutes (6 min).                                                                                                                                                                                                                                                                                                                                                                                                                                                                                                                                                                                                                                                                                                                                                                                                                                                                                             |
|                                               | Covariates                          | OCS [71]: A rapid screen of participants cognitive function, suitable for participants with impaired language and speech (15 min)<br>GDS [72]: A self-report screening tool to identify symptoms of depression in older adults (5 min).<br>BIT-conventional [73]: A set of 6 paper and pencil tasks (drawing, copying, cancellation, and bisection) designed to assess for the presence of spatial neglect. Clinically relevant spatial neglect is identified in participants scoring < 130 out of 146 points (15 min)                                                                                                                                                                                                                                                                                                                                                                                                                                                                                                                                                                                                                               |
|                                               | Manipulation Check                  | IET: aerobic fitness assessment which includes an analysis of expired gases, while participants perform cycling to exhaustion. Larger improvements are expected in the AET + PMT than Stretching + PMT condition.                                                                                                                                                                                                                                                                                                                                                                                                                                                                                                                                                                                                                                                                                                                                                                                                                                                                                                                                    |
| In-Scanner Behavioral Task (T1 and T3)        | Primary (Reading Outcomes)          | Reading Aloud: In each MRI session, participants will read <u>previously unseen</u> lists of 144 words of high and low spelling-sound consistency, frequency, and imageability [74–77] and 144 nonwords (e.g., <i>squard</i> ). <i>Frequency</i> indexes how often a word occurs in print; <i>spelling-sound consistency</i> is the difference between the number of “friends”, with similar spelling and pronunciation and “enemies”, with similar spelling but different pronunciation; and <i>imageability</i> reflects the relative ease, with which a word evokes an image. These variables measure orthography, and its mapping to semantics and phonology. The 8 word lists (high/low frequency, consistency, & imageability) are matched on length, orthographic and phonological neighborhood size, bigram (2-letter combination) and biphone (2-sound combination) frequencies. The nonwords are matched to the words in length and bigram and biphone frequency. Nonword reading is more sensitive to phonological deficits as it requires more effortful orthography-to-phonology mapping due to novelty and lack of semantics (24 min). |

<https://doi.org/10.1371/journal.pone.0317210.t002>



sagittal slices, 1mm<sup>3</sup> isotropic voxels, 5 min.) and a T2-weighted Fluid Attenuated Inversion Recovery (FLAIR) scan (TR = 7000 ms, TE = 108 ms, TI = 2397 ms, 50 slices, 1×1×3mm<sup>3</sup> voxels, Deep Resolve AI, 2 min.) from each participant at each timepoint.

**Lesion mapping.** Lesions will be labeled using a combination of manual segmentation and automated intensity-based voxel selection. T1-weighted and T2 FLAIR images acquired at baseline will be overlaid onto each other to assist in identification of voxels with abnormal intensity. To avoid warping of the lesion area during registration to the anatomical template, we will apply cost-function masking of the input image using the inverse of the lesion mask, as we have done previously [18, 44]. Lesion size will serve as a covariate in the analyses where appropriate.

**Functional neuroimaging.** For rsFC, resting state fMRI scans will be acquired using rapid simultaneous multi-slice echo-planar imaging (EPI) (TR = 1.5s, TE = 30ms, 44 slices, gap = .5mm, 2mm<sup>3</sup> isotropic voxels, N volumes = 328, eyes open, 8 min.). To standardize the rest condition across participants, we will instruct participants to look at a centrally presented fixation dot for the duration of the scan. A separate fieldmap image will be acquired in the same orientation and used to unwarp the EPI data. The EPI sequence above will also be used to measure task-induced brain activation. Participants will perform a reading aloud task (Table 2). The in-scanner stimuli will be presented using a combination of event-related and small-block design [81] to increase the signal-to-noise ratio and counteract potentially lower left hemisphere activation in stroke participants. As in an event-related design, each stimulus will be randomly offset by 100-400ms to facilitate error modeling. As in a block design, stimuli will be grouped by condition into 32-second blocks. Block order will be randomized, and each of the two fMRI runs will contain 9 reading blocks (32s), alternating with fixation (12s), and rest (8s) blocks, for a total duration of 52s per cycle (8:24 min run). Every 32s reading block will include 8 words from the same condition (high vs. low imageability, frequency, & consistency) or 8 nonwords, each shown for 1s, followed by a ~3s (offset) response period. The brief stimulus duration is implemented so that the neural responses to initiating word production are non-overlapping with overt speech [82–84]. Voice responses will be collected via an MRI-compatible noise-cancelling microphone (FOMRI III+, Optoacoustics). Reading aloud accuracy will be assessed independently by two raters, with any discrepancies resolved by a third tie breaker.

**Perfusion neuroimaging: Arterial spin labeling (ASL).** To measure changes in baseline CBF, we will collect perfusion-weighted scans using a pseudo-continuous multi-delay 3D ASL sequence (TR = 4400 ms, TE = 21.70 ms, TI = 800–4000 ms, inversion array size = 16, 1.72 x 1.72 x 4mm voxels, 24 axial slices, N measurements = 33, 5 min.). Using multiple inversion times (TI), i.e., time from the start of labeling to the start of image acquisition, will allow us to estimate regional transit times for arterial blood flow and to minimize artifacts around areas with significant stenosis [20, 85, 86].

**Analysis.** All variables will be examined for outliers and appropriate strategies will be instituted if problems are identified. AET + PMT and Stretching + PMT will be compared on demographic and baseline variables (including baseline hypoperfusion) using two-sample t tests, Chi-square, or equivalent non-parametric tests, as appropriate. ES will be calculated for all primary and secondary analyses. As recommended by Hahn [87] for active control trials, we will conduct both intent-to-treat and per-protocol analyses and conclude AET + PMT superiority on the primary outcomes if both analyses support it. We will handle missing data using multiple imputation (MI). For each variable with missing data, we will create multiple imputed datasets based on existing observed data. Each imputed dataset will be analyzed using the same statistical methods as the complete data, and results will be pooled across the imputed datasets to generate final estimates. This approach ensures that missing data do not bias the results or reduce statistical power [88, 89]. Per-protocol analyses will be conducted in those

completing follow-up testing and demonstrating good adherence and compliance, defined as completing at least 34 of the 40 treatment sessions as prescribed. This approximates the 85% adherence guideline for internal validity for RCTs on the Physiotherapy Evidence Database (PEDro) scale [90]. Should attrition exceed expectations, we will compare all baseline variables between participants who remain in the study and those who drop out. Further analyses are described below and detailed in the [S2 File](#).

**Study aim 1. The impact of AET + PMT on reading outcomes.** Using a 2x2 repeated measures design we will compare improvements on primary and secondary outcomes between AET + PMT and Stretching + PMT conditions. We will evaluate both the within-subjects effect of PMT on reading improvement (post-treatment > baseline) and the added effect of AET indicated by a significant condition by session interaction.

**Study aim 2. Immediate impact of acute aerobic exercise on CBF and functional connectivity.** *Perfusion MRI–ASL.* To examine the immediate effect of aerobic exercise on cerebral hemodynamics we will compare CBF measured with ASL at baseline (T1) with CBF measured after 20 min of moderate intensity aerobic exercise (or 20 min of light stretching, T2). Robertson *et al.* [35] found that 20 minutes of acute aerobic exercise on a cycle ergometer increased regional CBF by 18% ( $\pm 17$ , a large ES) in chronic stroke participants, particularly in the post-central, precentral, supramarginal gyri, and superior parietal lobule. This elevation persisted in most regions for up to 50 minutes post-exercise. In our RCT, we expect a similar increase in CBF after 20 minutes of cycling ( $T2 > T1$ ), while stretching may cause no change or a decrease in CBF, consistent with the effects of low-intensity exercise in the same study. Notably, blood pressure had returned to baseline before imaging in Robertson *et al.*'s study.

*RsFC.* We expect that acute and sustained aerobic exercise, compared to stretching, will positively impact cerebral hemodynamics and increase rsFC, providing a potential mechanism for cognitive benefits of exercise [91]. We will analyze rsFC using a Riemannian manifold geometry-based approach [92–94] to classify MRI sessions (T1 vs. T2 for study aim 2 and T1 vs. T3 for study aim 3), identifying key functional connectivity patterns across sessions and conditions (see [S2 File](#)).

**Study aim 3. Sustained impact of AET on brain outcomes.** Under study aim 3, we will contrast the baseline (T1, [Fig 1](#)) and post-treatment (T3) measures of CBF, rsFC, and reading-related brain activity. We expect that these measurements will be higher in the AET + PMT group compared to the Stretching + PMT group. Furthermore, it is hypothesized that the increases will be most evident in areas supporting phonology and orthography-phonology mapping, predicting behavioral gains in reading and other language skills. In individuals with stroke, both acute and long-term aerobic exercise leads to increased CBF in the parietal cortex, including SMG [34, 35], which plays a key role in orthography-phonology conversion [95–98]. Given that this process is often impaired in left-hemisphere stroke [4, 18, 44], we expect that priming the parietal cortex with aerobic exercise could enhance phonological skill re-learning during therapy. As for study aim 2, lesioned voxels will be omitted from the analyses.

*Perfusion MRI–ASL & rsFC.* To examine the sustained effect of combined AET + PMT on cerebral hemodynamics and network connectivity we will compare ASL CBF measurements and resting state fMRI rsFC measurements at baseline (T1) with those measured post-intervention (T3). The analyses will be carried out as detailed under study aim 2.

*Task fMRI.* The task-based fMRI analysis will allow us to definitively establish patterns of brain activation associated with reading improvements following AET + PMT. Specifically, we expect to observe an increase in brain activity of left-occipital, parietal, and frontal cortex in the AET + PMT condition from T1 to T3, a change not anticipated in the Stretching + PMT group. This increase should correspond with enhanced behavioral results, indicating attenuated reading deficits.

## Discussion

The goal of this RCT is to assess the efficacy of a personalized, evidence-based intervention aiming to enhance reading recovery post-stroke. The novelty of our approach is in including aerobic exercise immediately prior to each treatment session. AET increases brain circulation and has a beneficial effect on cardiovascular function [99, 100]. We hypothesize that the application of aerobic exercise will promote the acquisition, retention, and generalization of skills learned during PMT relative to an active control condition, because improved circulation will help to provide oxygen and nutrients to brain tissues supporting learning. This is particularly compelling in light of evidence reporting negative correlations between decreased left hemisphere CBF and language performance among stroke survivors [18, 19, 21, 22]. This RCT also includes multiple neuroimaging scans throughout the treatment, optimally positioning us to provide critical insight into the neural mechanisms of any resulting recovery.

There are potential pitfalls in the proposed analyses. For example, it is possible that individual variability may exceed the assumptions built into the sample size calculations, which would then impede the detection of significant group-by-time interaction effects. If this occurs, we will adapt an alternative analytical approach by exploring the role of individual factors in functional improvement. We will fit a mixed linear effects model (MLM) with participants' intercepts and slopes as random effects. Prior to running each MLM, we will assess the ability of age, sex, race, lesion volume, time since stroke, hypoperfusion, and language scores at baseline or other relevant variables to predict each of the outcome measures and will include the variables that uniquely predict variability in the outcomes as covariates in the MLM analysis. Age may be a key covariate as it is associated with poorer functional outcomes after stroke [101]. Similarly, race may predict differences in aphasia severity [102, 103]. Modeling individual variability via the MLM will allow us greater sensitivity in detecting treatment effects.

Another set of potential issues is related to participant adherence and compliance with the intervention protocol. Maintaining consistent participation in both the aerobic exercise and phonological treatment sessions is crucial for achieving meaningful outcomes. We have previously addressed this concern in a case series study, where the same rigorous schedule for delivering PMT was successfully implemented, demonstrating high feasibility and adherence [41]. We will monitor participants' compliance during each session using HR monitors to confirm they are reaching the targeted intensity level. Additionally, we will record any exercise completed outside of the treatment sessions, which could affect study outcomes.

Should the sample size not be sufficient to detect treatment effects in CBF, task-evoked brain activation, or rsFC, we will adopt a more sensitive ROI-based approach to analysis. Considering previous evidence that acute exercise increases CBF in parietal and frontal areas among stroke participants [35], we will evaluate the effect of AET + PMT vs. Stretching + PMT in a small subset of specific brain regions, including the SMG, precentral and postcentral gyri, and the IFG. We expect that nonword reading, in particular, may activate these regions to a greater extent following aerobic exercise, as nonword reading relies on phonological processing supported by the dorsal language pathway [97, 104, 105].

Upon successful completion of this RCT, we expect to demonstrate the value of integrating aerobic exercise with cognitive therapies to enhance stroke recovery. This could significantly impact the field of rehabilitation, stimulating development of novel combination treatments. In addition, the outcome of this RCT has the potential to provide a much deeper understanding of the mechanisms of stroke recovery in general and those specifically related to reading.

## Supporting information

**S1 File.**  
(PDF)

**S2 File.**  
(PDF)

## Acknowledgments

The authors would like to acknowledge the contribution of the following members of the investigative team: /Research Manager: Jenny Masmela, /Research Assistants: Pranav Reddy, Desiree Armas, Madeline Weiner, Melissa Rosahl, Chinedu Nkwo, Graduate Student: Zuzanna Osiecka, /Undergraduate trainees: Taylor McConnell, Catherine Hurst.

## Author Contributions

**Conceptualization:** Olga Boukrina, Elizabeth B. Madden, Brian M. Sandroff, William W. Graves.

**Data curation:** Olga Boukrina, Brian M. Sandroff, Abubakar Yamin, Yekyung Kong, William W. Graves.

**Formal analysis:** Xiangqin Cui, Abubakar Yamin.

**Funding acquisition:** Olga Boukrina, Elizabeth B. Madden, Brian M. Sandroff, Yekyung Kong, William W. Graves.

**Investigation:** Olga Boukrina, Elizabeth B. Madden, Yekyung Kong, William W. Graves.

**Methodology:** Olga Boukrina, Elizabeth B. Madden, Brian M. Sandroff, Xiangqin Cui, Abubakar Yamin, William W. Graves.

**Project administration:** Olga Boukrina.

**Resources:** Elizabeth B. Madden, Brian M. Sandroff, Xiangqin Cui, William W. Graves.

**Software:** Abubakar Yamin.

**Supervision:** Olga Boukrina, Elizabeth B. Madden, Brian M. Sandroff, Yekyung Kong.

**Validation:** Olga Boukrina, Elizabeth B. Madden, Brian M. Sandroff, Xiangqin Cui, William W. Graves.

**Visualization:** Olga Boukrina, Xiangqin Cui, Abubakar Yamin.

**Writing – original draft:** Olga Boukrina.

**Writing – review & editing:** Olga Boukrina, Elizabeth B. Madden, Brian M. Sandroff, Xiangqin Cui, Abubakar Yamin, Yekyung Kong, William W. Graves.

## References

1. Simmons-Mackie N. and Cherney L. R., "Aphasia in North America: Frequency, demographics, impact, communication access, services and service gaps," *Arch. Phys. Med. Rehabil.*, vol. 99, no. 10, p. e117, 2018, [Online]. Available: [www.aphasiaaccess.org](http://www.aphasiaaccess.org).
2. Pedersen P. M., Vinter K., and Olsen T. S., "Aphasia after stroke: Type, severity and prognosis: The Copenhagen aphasia study," *Cerebrovasc. Dis.*, vol. 17, no. 1, pp. 35–43, 2004, <https://doi.org/10.1159/000073896> PMID: 14530636

3. Flowers H. L. et al., "Poststroke Aphasia Frequency, Recovery, and Outcomes: A Systematic Review and Meta-Analysis," *Arch. Phys. Med. Rehabil.*, vol. 97, no. 12, pp. 2188–2201.e8, 2016, <https://doi.org/10.1016/j.apmr.2016.03.006> PMID: 27063364
4. Brookshire C. E., Willson J. P., Nadeau S. E., Gonzalez Rothi L. J., and Kendall D. L., "Frequency, nature, and predictors of alexia in a convenience sample of individuals with chronic aphasia," *Aphasiology*, no. August, pp. 1–17, Aug. 2014, <https://doi.org/10.1080/02687038.2014.945389>
5. Koleck M., Gana K., Lucot C., Darrigrand B., Mazaux J.-M., and Glize B., "Quality of life in aphasic patients 1 year after a first stroke," *Qual. Life Res.*, vol. 26, no. 1, pp. 45–54, Jan. 2017, <https://doi.org/10.1007/s11136-016-1361-z> PMID: 27405871
6. Madden E. B. and Bush E., "Insights on Literacy From Stroke Survivors With Aphasia: A Mixed-Methods Inquiry," *Am. J. Speech-Language Pathol.*, Jul. 2024, [https://doi.org/10.1044/2024\\_AJSLP-23-00360](https://doi.org/10.1044/2024_AJSLP-23-00360) PMID: 38820595
7. Maddy K. M., Capilouto G. J., and McComas K. L., "The effectiveness of semantic feature analysis: An evidence-based systematic review," *Ann. Phys. Rehabil. Med.*, vol. 57, no. 4, pp. 254–267, 2014, <https://doi.org/10.1016/j.rehab.2014.03.002> PMID: 24797214
8. Quique Y. M., Evans W. S., and Dickey M. W., "Acquisition and generalization responses in aphasia naming treatment: A meta-analysis of semantic feature analysis outcomes," *Am. J. Speech-Language Pathol.*, vol. 28, no. 1S, pp. 230–246, 2019, [https://doi.org/10.1044/2018\\_AJSLP-17-0155](https://doi.org/10.1044/2018_AJSLP-17-0155) PMID: 30208415
9. Whitworth A. et al., "NARNIA: a new twist to an old tale. A pilot RCT to evaluate a multilevel approach to improving discourse in aphasia," *Aphasiology*, vol. 29, no. 11, pp. 1345–1382, 2015, <https://doi.org/10.1080/02687038.2015.1081143>
10. Milman L., "An integrated approach for treating discourse in aphasia bridging the gap between language impairment and functional communication," *Top. Lang. Disord.*, vol. 36, no. 1, pp. 80–96, 2016, <https://doi.org/10.1097/TLD.0000000000000076>
11. Edmonds L. A., "A review of Verb Network Strengthening Treatment: Theory, methods, results, and clinical implications," *Top. Lang. Disord.*, vol. 36, no. 2, pp. 123–135, 2016, <https://doi.org/10.1097/TLD.0000000000000088>
12. Brookshire C. E., Conway T., Pompon R. H., Oelke M., and Kendall D. L., "Effects of intensive phono-motor treatment on reading in eight individuals with aphasia and phonological alexia," *Am. J. Speech-Language Pathol.*, vol. 1, no. 23, pp. 300–311, 2014. [https://doi.org/10.1044/2014\\_AJSLP-13-0083](https://doi.org/10.1044/2014_AJSLP-13-0083) PMID: 24686537
13. Madden E. B., Torrence J., and Kendall D. L., "Cross-modal generalization of anomia treatment to reading in aphasia," *Aphasiology*, vol. 35, no. 7. Taylor & Francis, [London], pp. 875–899, 2021, <https://doi.org/10.1080/02687038.2020.1734529>
14. Beeson P. M., Rising K., DeMarco A. T., Foley T. H., and Rapcsak S. Z., "The nature and treatment of phonological text agraphia," *Neuropsychol. Rehabil.*, vol. 28, no. 4, pp. 568–588, 2018, <https://doi.org/10.1080/09602011.2016.1199387> PMID: 27392251
15. Beeson P. M., Rising K., Kim E. S., and Rapcsak S. Z., "A treatment sequence for phonological alexia/agraphia," *J. Speech, Lang. Hear. Res.*, vol. 53, no. 2, pp. 450–468, 2010, [https://doi.org/10.1044/1092-4388\(2009/08-0229\)](https://doi.org/10.1044/1092-4388(2009/08-0229)) PMID: 20360466
16. Starrfelt R., Lافsdóttir R. R. Ó., and Arendt I. M., "Rehabilitation of pure alexia: A review," *Neuropsychol. Rehabil.*, vol. 23, no. 5, pp. 755–779, 2013, <https://doi.org/10.1080/09602011.2013.809661> PMID: 23808895
17. Woodhead Z. V. J. et al., "Randomized trial of iReadMore word reading training and brain stimulation in central alexia," *Brain*, vol. 141, no. 7, pp. 2127–2141, 2018, <https://doi.org/10.1093/brain/awy138> PMID: 29912350
18. Boukrina O., Barrett A. M. M., and Graves W. W. W., "Cerebral perfusion of the left reading network predicts recovery of reading in subacute to chronic stroke," *Hum. Brain Mapp.*, vol. 40, no. 18, pp. 1–14, 2019, <https://doi.org/10.1002/hbm.24773> PMID: 31452284
19. Thompson C. K. et al., "Intrahemispheric Perfusion in Chronic Stroke-Induced Aphasia," *Neural Plast.*, vol. 236169, pp. 1–15, 2017, <https://doi.org/10.1155/2017/2361691> PMID: 28357141
20. Brumm K. P., Perthen J. E., Liu T. T., Haist F., Ayalon L., and Love T., "An arterial spin labeling investigation of cerebral blood flow deficits in chronic stroke survivors," *Neuroimage*, vol. 51, no. 3, pp. 995–1005, 2010, <https://doi.org/10.1016/j.neuroimage.2010.03.008> PMID: 20211268
21. Hillis A. E., "Magnetic resonance perfusion imaging in the study of language," *Brain Lang.*, vol. 102, no. 2, pp. 165–75, Aug. 2007, <https://doi.org/10.1016/j.bandl.2006.04.016> PMID: 16757020



22. Walenski M. et al., "Perilesional Perfusion in Chronic Stroke-Induced Aphasia and Its Response to Behavioral Treatment Interventions," *Neurobiol. Lang.*, vol. 3, no. 2, pp. 345–363, 2022, [https://doi.org/10.1162/nol\\_a\\_00068](https://doi.org/10.1162/nol_a_00068) PMID: 35685084
23. Richardson J. D., Baker J. M., Morgan P. S., Rorden C., Bonilha L., and Fridriksson J., "Cerebral perfusion in chronic stroke: Implications for lesion-symptom mapping and functional MRI," *Behav. Neurol.*, vol. 24, no. 2, pp. 117–122, 2011, <https://doi.org/10.3233/BEN-2011-0283> PMID: 21606572
24. Crisp J. and Lambon Ralph M. A., "Unlocking the nature of the phonological-deep dyslexia continuum: The keys to reading aloud are in phonology and semantics," *J. Cogn. Neurosci.*, vol. 18, no. 3, pp. 348–362, 2006, <https://doi.org/10.1162/089892906775990543> PMID: 16513001
25. Rapcsak S. Z. et al., "Phonological dyslexia and dysgraphia: Cognitive mechanisms and neural substrates," *Cortex*, vol. 45, no. 5, pp. 575–591, 2009, <https://doi.org/10.1016/j.cortex.2008.04.006> PMID: 18625494
26. Beeson P. M., Rising K., Sachs A., and Rapcsak S. Z., "Common predictors of spoken and written language performance in aphasia, alexia, and agraphia," *Front. Hum. Neurosci.*, vol. 16, no. November, pp. 1–23, 2022, <https://doi.org/10.3389/fnhum.2022.1025468> PMID: 36419644
27. Madden E. B., Conway T., Henry M. L., Spencer K. A., Yorkston K. M., and Kendall D. L., "The relationship between non-orthographic language abilities and reading performance in chronic aphasia: An exploration of the primary systems hypothesis," *J. Speech, Lang. Hear. Res.*, vol. 61, no. 12, pp. 3038–3054, 2018, [https://doi.org/10.1044/2018\\_JSLHR-L-18-0058](https://doi.org/10.1044/2018_JSLHR-L-18-0058) PMID: 30515520
28. Boukrina O., Graves W. W., and Barrett A. M., "Cerebral perfusion and brain activity related to reading aloud in subacute-to-chronic stroke recovery," in *Cognitive Neuroscience Society*, 2020, p. Abstract #E51.
29. Bouchard C., Shephard R. J., and Stephens T., Eds., *Physical activity, fitness, and health*. Champaign, IL, England: Human Kinetics Publishers, 1994.
30. Mayer J. F., Sandberg C. W., Mozeiko J., Madden E. B., and Murray L. L., "Cognitive and Linguistic Benefits of Aerobic Exercise: A State-of-the-Art Systematic Review of the Stroke Literature," *Front. Rehabil. Sci.*, vol. 2, no. December, pp. 1–14, 2021, <https://doi.org/10.3389/fresc.2021.785312> PMID: 36188840
31. Zheng G., Zhou W., Xia R., Tao J., and Chen L., "Aerobic Exercises for Cognition Rehabilitation following Stroke: A Systematic Review," *J. Stroke Cerebrovasc. Dis.*, vol. 25, no. 11, pp. 2780–2789, 2016, <https://doi.org/10.1016/j.jstrokecerebrovasdis.2016.07.035> PMID: 27554073
32. Northey J. M., Cherbuin N., Pumpa K. L., Smee D. J., and Rattray B., "Exercise interventions for cognitive function in adults older than 50: A systematic review with meta-Analysis," *Br. J. Sports Med.*, vol. 52, no. 3, pp. 154–160, 2018, <https://doi.org/10.1136/bjsports-2016-096587> PMID: 28438770
33. Lefferts W. K., DeBlois J. P., White C. N., and Heffernan K. S., "Effects of Acute Aerobic Exercise on Cognition and Constructs of Decision-Making in Adults With and Without Hypertension," *Front. Aging Neurosci.*, vol. 11, no. March, pp. 1–11, 2019, <https://doi.org/10.3389/fnagi.2019.00041> PMID: 30906257
34. Robertson A. D., Marzolini S., Middleton L. E., Basile V. S., Oh P. I., and MacIntosh B. J., "Exercise training increases parietal lobe cerebral blood flow in chronic stroke: An observational study," *Front. Aging Neurosci.*, vol. 9, no. SEP, pp. 1–9, 2017, <https://doi.org/10.3389/fnagi.2017.00318> PMID: 29033829
35. Robertson A. D. et al., "Exercise intensity modulates the change in cerebral blood flow following aerobic exercise in chronic stroke," *Exp. Brain Res.*, vol. 233, no. 8, pp. 2467–2475, 2015, <https://doi.org/10.1007/s00221-015-4317-6> PMID: 26003127
36. Kendall D. L., Oelke M., Brookshire C. E., and Nadeau S. E., "The Influence of Phonomotor Treatment on Word Retrieval Abilities in 26 Individuals With Chronic Aphasia: An Open Trial," *J. Speech, Lang. Hear. Res.*, vol. 58, pp. 798–812, 2015, [https://doi.org/10.1044/2015\\_JSLHR-L-14-0131](https://doi.org/10.1044/2015_JSLHR-L-14-0131) PMID: 25766309
37. Pompon R. H. et al., "Influence of linguistic and nonlinguistic variables on generalization and maintenance following phonomotor treatment for aphasia," *Am. J. Speech-Language Pathol.*, vol. 26, no. November, pp. 1092–1104, 2017, [https://doi.org/10.1044/2017\\_AJSLP-16-0175](https://doi.org/10.1044/2017_AJSLP-16-0175) PMID: 28832881
38. Silkes J. P., Fergadiotis G., Hunting Pompon R., Torrence J., and Kendall D. L., "Effects of phonomotor treatment on discourse production," *Aphasiology*, vol. 33, no. 2, pp. 125–139, 2019, <https://doi.org/10.1080/02687038.2018.1512080> PMID: 30956383
39. Conway T. W. et al., "Treatment of a case of phonological alexia with agraphia using the Auditory Discrimination in Depth (ADD) program," *J. Int. Neuropsychol. Soc.*, vol. 4, no. 6, pp. 608–620, 1998, <https://doi.org/10.1017/s1355617798466104> PMID: 10050366

40. Kendall D. L., Conway T., Rosenbek J., and Gonzalez-Rothi L., "Phonological rehabilitation of acquired phonologic alexia," *Aphasiology*, vol. 17, no. 11, pp. 1073–1095, 2003, <https://doi.org/10.1080/02687030344000355>
41. Boukrina O., Madden E. B., Giordano N., Karim D., Staples R., and Graves W. W., "Targeting phonology or semantics to improve reading aloud response times and accuracy: A case series investigation of stroke survivors with aphasia," *Am. J. Speech-Language Pathol.*, vol. August, pp. 1–33, 2024, [https://doi.org/10.1044/2024\\_AJSLP-23-00364](https://doi.org/10.1044/2024_AJSLP-23-00364) AB. PMID: 39146330
42. Moher D. et al., "CONSORT 2010 explanation and elaboration: updated guidelines for reporting parallel group randomised trials," *BMJ*, vol. 340, 2010, <https://doi.org/10.1136/bmj.c869> PMID: 20332511
43. La Pointe L. L. and Horner J., *Reading Comprehension Battery for Aphasia*, 2nd. Austin, TX: Pro-Ed, 1998.
44. Boukrina O., Barrett A. M., Alexander E. J., Yao B., and Graves W. W., "Neurally dissociable cognitive components of reading deficits in subacute stroke," *Front. Hum. Neurosci.*, vol. 9, no. May, 2015, <https://doi.org/10.3389/fnhum.2015.00298> PMID: 26082701
45. Kertesz A., *Western Aphasia Battery Revised*. San Antonio, TX: Pearson, 2007.
46. Walker G. M. and Schwartz M. F., "Short-form Philadelphia naming test: Rationale and empirical evaluation," *Am. J. Speech-Language Pathol.*, vol. 21, no. 2, pp. 140–154, 2012, [https://doi.org/10.1044/1058-0360\(2012/11-0089\)](https://doi.org/10.1044/1058-0360(2012/11-0089)) PMID: 22294412
47. Swinburn K., Porter G., and Howard D., *Comprehensive aphasia test*. New York: Psychology Press, 2004.
48. Hreha K. et al., "Assessing chronic stroke survivors with aphasia sheds light on prevalence of spatial neglect," *Top. Stroke Rehabil.*, vol. 24, no. 2, pp. 91–98, 2017, <https://doi.org/10.1080/10749357.2016.1196906> PMID: 27322860
49. Warburton D. E. R., Bredin S. S. D., Jamnik V. K., and Gledhill N., "INTERNATIONAL LAUNCH OF THE PAR-Q+ AND ePARmed-X+ Validation of the PAR-Q+ and ePARmed-X+," *Heal. Fit. J. Canada Heal. Fit. J. Canada Heal. Fit. J. Canada*, vol. 4, no. 2, pp. 1920–6216, 2011.
50. Carmichael S. T., "The 3 Rs of Stroke Biology: Radial, Relayed, and Regenerative," *Neurotherapeutics*, vol. 13, no. 2, pp. 348–359, 2016, <https://doi.org/10.1007/s13311-015-0408-0> PMID: 26602550
51. Dennett R., Madsen L. T., Connolly L., Hosking J., Dalgas U., and Freeman J., "Adherence and drop-out in randomized controlled trials of exercise interventions in people with multiple sclerosis: A systematic review and meta-analyses," *Mult. Scler. Relat. Disord.*, vol. 43, no. April, p. 102169, 2020, <https://doi.org/10.1016/j.msard.2020.102169> PMID: 32470858
52. Harnish S. M. et al., "Aerobic Exercise as an adjuvant to aphasia therapy: Theory, preliminary findings, and future directions," *Clin. Ther.*, vol. 40, no. 1, pp. 35–48, 2018, <https://doi.org/10.1016/j.clinthera.2017.12.002> PMID: 29277374
53. Gordon E. M., Laumann T. O., Adeyemo B., Huckins J. F., Kelley W. M., and Petersen S. E., "Generation and Evaluation of a Cortical Area Parcellation from Resting-State Correlations," *Cereb. Cortex*, pp. bhu239-, 2014, <https://doi.org/10.1093/cercor/bhu239> PMID: 25316338
54. Kendall D. L., Oelke Moldestad M., Allen W., Torrence J., and Nadeau S. E., "Phonomotor versus semantic feature analysis treatment for anomia in 58 persons with aphasia: A randomized controlled trial," *J. Speech, Lang. Hear. Res.*, vol. 62, no. 12, pp. 4464–4482, 2019, [https://doi.org/10.1044/2019\\_JSLHR-L-18-0257](https://doi.org/10.1044/2019_JSLHR-L-18-0257) PMID: 31805247
55. Moore S. A. et al., "Effects of Community Exercise Therapy on Metabolic, Brain, Physical, and Cognitive Function Following Stroke: A Randomized Controlled Pilot Trial," *Neurorehabil. Neural Repair*, vol. 29, no. 7, pp. 623–635, 2015, <https://doi.org/10.1177/1545968314562116> PMID: 25538152
56. Stothart C. R., Simons D. J., Boot W. R., and Kramer A. F., "Is the effect of aerobic exercise on cognition a placebo effect?," *PLoS One*, vol. 9, no. 10, pp. 1–8, 2014, <https://doi.org/10.1371/journal.pone.0109557> PMID: 25289674
57. Erickson K. I. et al., "Exercise training increases size of hippocampus and improves memory," *Proc. Natl. Acad. Sci. U. S. A.*, vol. 108, no. 7, pp. 3017–3022, 2011, <https://doi.org/10.1073/pnas.1015950108> PMID: 21282661
58. Baker L. D. et al., "Effects of aerobic exercise mild cognitive impairment: A controlled trial," *Arch. Neurol.*, vol. 67, no. 1, pp. 71–79, 2010, <https://doi.org/10.1016/j.sbspro.2011.10.487>
59. Stern Y. et al., "Effect of aerobic exercise on cognition in younger adults: A randomized clinical trial," *Neurology*, vol. 92, no. 9, pp. E905–E916, 2019, <https://doi.org/10.1212/WNL.0000000000007003> PMID: 30700591
60. Sandroff B. M. et al., "Effects of walking exercise training on learning and memory and hippocampal neuroimaging outcomes in MS: A targeted, pilot randomized controlled trial," *Contemp. Clin. Trials*,

- vol. 110, no. September, p. 106563, 2021, <https://doi.org/10.1016/j.cct.2021.106563> PMID: 34496278
61. Sandroff B. M. et al., "Protocol for a systematically-developed, phase I/II, single-blind randomized controlled trial of treadmill walking exercise training effects on cognition and brain function in persons with multiple sclerosis," *Contemp. Clin. Trials*, vol. 87, no. October, 2019, <https://doi.org/10.1016/j.cct.2019.105878> PMID: 31704437
  62. Sandroff B. M. et al., "The effects of cognitive rehabilitation combined with aerobic exercise or stretching-and-toning on new learning and memory in persons with moderate-to-severe TBI: Protocol for a randomized controlled trial," *Contemp. Clin. Trials*, vol. 134, no. August, p. 107331, 2023, <https://doi.org/10.1016/j.cct.2023.107331> PMID: 37734538
  63. Sugawara J. et al., "Aerobic exercise training reduces cerebrovascular impedance in older adults: a 1-year randomized controlled trial," *J. Appl. Physiol.*, vol. 133, no. 4, pp. 902–912, 2022.
  64. Tomoto T. et al., "One-Year Aerobic Exercise Reduced Carotid Arterial Stiffness and Increased Cerebral Blood Flow in Amnesic Mild Cognitive Impairment," *J. Alzheimer's Dis.*, vol. 80, pp. 841–853, 2021, <https://doi.org/10.3233/JAD-201456> PMID: 33579857
  65. Behn N. et al., "Developing, monitoring, and reporting of fidelity in aphasia trials: core recommendations from the collaboration of aphasia trialists (CATs) trials for aphasia panel," *Aphasiology*, vol. 37, no. 11, pp. 1733–1755, 2023, <https://doi.org/10.1080/02687038.2022.2037502>
  66. Binder J. R., Pillay S. B., Humphries C. J., Gross W. L., Graves W. W., and Book D. S., "Surface errors without semantic impairment in acquired dyslexia: A voxel-based lesion-symptom mapping study," *Brain*, vol. 139, no. 5, pp. 1517–1526, 2016, <https://doi.org/10.1093/brain/aww029> PMID: 26966139
  67. Pillay S. B., Stengel B. C., Humphries C., Book D. S., and Binder J. R., "Cerebral localization of impaired phonological retrieval during rhyme judgment," *Ann. Neurol.*, vol. 76, no. 5, pp. 738–746, 2014, <https://doi.org/10.1002/ana.24266> PMID: 25164766
  68. Cassar M. and Treiman R., "The beginnings of orthographic knowledge: Children's knowledge of double letters in words," *J. Educ. Psychol.*, vol. 89, no. 4, pp. 631–644, 1997, <https://doi.org/10.1037/0022-0663.89.4.631>
  69. Moore J. L., Potter K., Blankshain K., Kaplan S. L., O'Dwyer L. C., and Sullivan J. E., "A core set of outcome measures for adults with neurologic conditions undergoing rehabilitation," *J. Neurol. Phys. Ther.*, vol. 42, no. 3, pp. 174–220, 2018, <https://doi.org/10.1097/NPT.0000000000000229> PMID: 29901487
  70. Kosak M. and Smith T., "Comparison of the 2-, 6-, and 12-minute walk tests in patients with stroke," *J. Rehabil. Res. Dev.*, vol. 42, no. 1, pp. 103–108, 2005, <https://doi.org/10.1682/jrrd.2003.11.0171> PMID: 15742254
  71. Demeyere N., Riddoch M. J., Slavkova E. D., Bickerton W. L., and Humphreys G. W., "The Oxford Cognitive Screen (OCS): Validation of a stroke-specific short cognitive screening tool," *Psychol. Assess.*, vol. 27, no. 3, pp. 883–894, 2015, <https://doi.org/10.1037/pas0000082> PMID: 25730165
  72. Yesavage J. A. et al., "Development of validation of a geriatric screening scale: a preliminary report," *J. Psychiatr. Res.*, vol. 17, no. 1, pp. 37–49, 1982.
  73. Halligan P., Wilson B., and Cockburn J., "A short screening test for visual neglect in stroke patients," *Int. Disabil. Stud.*, vol. 12, no. 3, pp. 95–99, 1990. <https://doi.org/10.3109/03790799009166260> PMID: 2096121
  74. Jared D., "Spelling-Sound Consistency and Regularity Effects in Word Naming," *J. Mem. Lang.*, vol. 46, no. 4, pp. 723–750, May 2002, <https://doi.org/10.1006/jmla.2001.2827>
  75. Monsell S., "The nature of word frequency effects in reading," in *Basic processes in reading: visual word recognition*, Besner D. and Humphreys G., Eds. Hillsdale, NJ: Lawrence Erlbaum Associates, 1991, pp. 148–197.
  76. Strain E., Patterson K., and Seidenberg M. S., "Semantic effects in single-word naming," *J. Exp. Psychol. Learn. Mem. Cogn.*, vol. 21, no. 5, pp. 1140–54, Sep. 1995, [Online]. Available: <http://www.ncbi.nlm.nih.gov/pubmed/8744959>. <https://doi.org/10.1037/0278-7393.21.5.1140> PMID: 8744959
  77. Taraban R. and McClelland J. L., "Conspiracy effects in word pronunciation," *J. Mem. Lang.*, vol. 26, pp. 608–631, 1987.
  78. Pescatello P. D., Arena L.S., Riebe R., Thompson D., *ACSM's guidance for exercise testing and prescription*, 9th ed. Philadelphia, PA: Wolters Kluwer/Lippincott Williams & Wilkins, 2014.
  79. Klaren R. E., Sandroff B. M., Fernhall B., and Motl R. W., "Comprehensive Profile of Cardiopulmonary Exercise Testing in Ambulatory Persons with Multiple Sclerosis," *Sports medicine*, vol. 46, no. 9. Adis International, [Mairangi Bay, Auckland, N.Z.], pp. 1365–1379, 2016, <https://doi.org/10.1007/s40279-016-0472-6> PMID: 26801918

80. American College of Sports Medicine, *ACSM's guidelines for exercise testing and prescription*, 11th ed. Lippincott, Williams & Wilkins, 2020.
81. Soltysik D. A. and Hyde J. S., "Strategies for block-design fMRI experiments during task-related motion of structures of the oral cavity," *Neuroimage*, vol. 29, no. 4, pp. 1260–71, Feb. 2006, <https://doi.org/10.1016/j.neuroimage.2005.08.063> PMID: 16275020
82. Boukrina O. and Graves W. W., "Neural networks underlying contributions from semantics in reading aloud," *Front. Hum. Neurosci.*, vol. 7, no. September, p. 518, Jan. 2013, <https://doi.org/10.3389/fnhum.2013.00518> PMID: 24032009
83. Graves W. W., Desai R., Humphries C., Seidenberg M. S., and Binder J. R., "Neural systems for reading aloud: a multiparametric approach," *Cereb. Cortex*, vol. 20, no. 8, pp. 1799–815, Aug. 2010, <https://doi.org/10.1093/cercor/bhp245> PMID: 19920057
84. Graves W., Coulanges L., Levinson H., Boukrina O., and Conant L. L., "Neural effects of gender and age interact in reading," *Front. Neurosci.*, vol. 13, no. OCT, pp. 1–11, 2019, <https://doi.org/10.3389/fnins.2019.01115> PMID: 31680843
85. Alsop D. C. et al., "Recommended implementation of arterial spin-labeled Perfusion mri for clinical applications: A consensus of the ISMRM Perfusion Study group and the European consortium for ASL in dementia," *Magn. Reson. Med.*, vol. 73, no. 1, pp. 102–116, 2015, <https://doi.org/10.1002/mrm.25197> PMID: 24715426
86. Detre J. A., Alsop D. C., Vives L. R., Maccotta L., Teener J. W., and Raps E. C., "Noninvasive MRI evaluation of cerebral blood flow in cerebrovascular disease," *Neurology*, vol. 50, no. 3, pp. 633–641, 1998, <https://doi.org/10.1212/wnl.50.3.633> PMID: 9521248
87. Hahn S., "Understanding noninferiority trials," *Korean J. Pediatr.*, vol. 55, no. 11, pp. 403–407, 2012, <https://doi.org/10.3345/kjp.2012.55.11.403> PMID: 23227058
88. Nakagawa S. and Hauber M. E., "Great challenges with few subjects: Statistical strategies for neuroscientists," *Neurosci. Biobehav. Rev.*, vol. 35, no. 3, pp. 462–473, 2011, <https://doi.org/10.1016/j.neubiorev.2010.06.003> PMID: 20600287
89. Austin P. C., White I. R., Lee D. S., and van Buuren S., "Missing Data in Clinical Research: A Tutorial on Multiple Imputation," *Can. J. Cardiol.*, vol. 37, no. 9, pp. 1322–1331, 2021, <https://doi.org/10.1016/j.cjca.2020.11.010> PMID: 33276049
90. Sherrington C., Herbert R. D., Maher C. G., and Moseley A. M., "PEDro. A database of randomized trials and systematic reviews in physiotherapy," *Man. Ther.*, vol. 5, no. 4, pp. 223–226, 2000, <https://doi.org/10.1054/math.2000.0372> PMID: 11052901
91. Burdette J. H. et al., "Using network science to evaluate exercise-associated brain changes in older adults," *Front. Aging Neurosci.*, vol. 2, no. JUN, pp. 1–10, 2010, <https://doi.org/10.3389/fnagi.2010.00023> PMID: 20589103
92. Yamin M. A. et al., "Analysis of Dynamic Brain Connectivity Through Geodesic Clustering," in *Image Analysis and Processing—ICIAP 2019: 20th International Conference Proceedings*, 2019, pp. 640–648.
93. Yamin M. A. et al., "Discovering functional connectivity features characterizing multiple sclerosis phenotypes using explainable artificial intelligence," *Hum. Brain Mapp.*, vol. 44, no. 6, pp. 2294–2306, 2023, <https://doi.org/10.1002/hbm.26210> PMID: 36715247
94. Yamin M. A. et al., "Encoding brain networks through geodesic clustering of functional connectivity for multiple sclerosis classification," *Proc.—Int. Conf. Pattern Recognit.*, pp. 10106–10112, 2021, <https://doi.org/10.1109/ICPR48806.2021.9412939>
95. Cattinelli I., Borghese N. A., Gallucci M., and Paulesu E., "Reading the reading brain: A new meta-analysis of functional imaging data on reading," *J. Neurolinguistics*, vol. 26, no. 1, pp. 214–238, Sep. 2013, <https://doi.org/10.1016/j.jneuroling.2012.08.001>
96. Jobard G., Crivello F., and Tzourio-Mazoyer N., "Evaluation of the dual route theory of reading: a meta-analysis of 35 neuroimaging studies," *Neuroimage*, vol. 20, no. 2, pp. 693–712, Oct. 2003, [https://doi.org/10.1016/S1053-8119\(03\)00343-4](https://doi.org/10.1016/S1053-8119(03)00343-4) PMID: 14568445
97. Vigneau M. et al., "Meta-analyzing left hemisphere language areas: phonology, semantics, and sentence processing," *Neuroimage*, vol. 30, no. 4, pp. 1414–32, May 2006, <https://doi.org/10.1016/j.neuroimage.2005.11.002> PMID: 16413796
98. Stoeckel C., Gough P. P. M., Watkins K. K. E., and Devlin J. J. T., "Supramarginal gyrus involvement in visual word recognition," *Cortex*, vol. 45, no. 9, pp. 1091–1096, 2009, <https://doi.org/10.1016/j.cortex.2008.12.004> PMID: 19232583
99. El-Sayes J., Harasym D., Turco C. V., Locke M. B., and Nelson A. J., "Exercise-Induced Neuroplasticity: A Mechanistic Model and Prospects for Promoting Plasticity," *Neuroscientist*, vol. 25, no. 1, pp. 65–85, 2019, <https://doi.org/10.1177/1073858418771538> PMID: 29683026

100. Lista I. and Sorrentino G., "Biological mechanisms of physical activity in preventing cognitive decline," *Cell. Mol. Neurobiol.*, vol. 30, no. 4, pp. 493–503, 2010, <https://doi.org/10.1007/s10571-009-9488-x> PMID: 20041290
101. Granger C. V., Hamilton B. B., and Fiedler R. C., "Discharge outcome after stroke rehabilitation," *Stroke*, vol. 23, no. 7, pp. 978–982, 1992, <https://doi.org/10.1161/01.str.23.7.978> PMID: 1615548
102. Ellis C. and Peach R. K., "Racial-Ethnic Differences in Word Fluency and Auditory Comprehension Among Persons With Poststroke Aphasia," *Arch. Phys. Med. Rehabil.*, vol. 98, no. 4, pp. 681–686, 2017, <https://doi.org/10.1016/j.apmr.2016.10.010> PMID: 27840130
103. Jacobs M. and Ellis C., "Racial disparities in post-stroke aphasia: A need to look beyond the base analysis," *J. Natl. Med. Assoc.*, pp. 1–7, 2022, <https://doi.org/10.1016/j.jnma.2022.01.009> PMID: 35210094
104. Hickok G. and Poeppel D., "The cortical organization of speech processing," *Nat. Rev. Neurosci.*, vol. 8, no. May, pp. 393–403, 2007, Accessed: Sep. 13, 2013. [Online]. Available: <http://www.nature.com/nrn/journal/v8/n5/abs/nrn2113.html>. <https://doi.org/10.1038/nrn2113> PMID: 17431404
105. Gow D. W., "The cortical organization of lexical knowledge: a dual lexicon model of spoken language processing," *Brain Lang.*, vol. 121, no. 3, pp. 273–88, Jun. 2012, <https://doi.org/10.1016/j.bandl.2012.03.005> PMID: 22498237
